# Supplementary material for: The discriminatory power of the T cell receptor
Source: eLife. 2021 May 25;10:e67092. doi: 10.7554/eLife.67092 (PMC8219380; doi:10.7554/eLife.67092)
Supplement: Figure 1—source data 3. — Includes all peptides used for SPR standard curve and functional experiments. N/A: not applicable. [file elife-67092-fig1-data3.csv]

		KD (Bmax fitted)				KD (Bmax const.)
Name	Sequence	Mean (μM)	SD (μM)	CV (%)	n	Mean (μM)	SD (μM)	CV (%)	n
Tax WT	LLFGYPVYV	2.01	0.437	21.8	4	1.66	0.27	16.3	5
Tax 5F	LLFGFPVYV	3.36	2.12	63.2	2	2.67	2.08	77.9	2
Tax 7T	LLFGYPTYV	3.42	N/A	N/A	1	2.8	N/A	N/A	1
Tax 5W	LLFGWPVYV	6.08	N/A	N/A	1	5	N/A	N/A	1
Tax 1M	MLFGYPVYV	6.11	N/A	N/A	1	6.1	N/A	N/A	1
Tax 1A	ALFGYPVYV	4.25	0.571	13.4	4	6.5	0.902	13.9	4
Tax 1V	VLFGYPVYV	6.92	1.63	23.5	3	7.97	1.62	20.3	3
Tax 6V	LLFGYVVYV	13.5	N/A	N/A	1	21.1	N/A	N/A	1
Tax 7R	LLFGYPRYV	11.5	1.85	16	3	21.4	5.47	25.5	3
Tax 5H	LLFGHPVYV	36.2	13.1	36.2	3	56.1	8.23	14.7	3
Tax 8F	LLFGYPVFV	37.1	12.9	34.7	3	60	20.5	34.1	3
Tax 7H	LLFGYPHYV	45.8	18	39.3	4	67.8	27.4	40.4	4
Tax 4A	LLFAYPVYV	72.5	5.28	7.3	3	118	18.9	16	3
Tax 8A	LLFGYPVAV	599	688	114.8	3	565	66	11.7	3
Tax 4A8A	LLFAYPVAV	194	207	106.6	3	1869	561	30	3
Tax 5H8A	LLFGHPVAV	2816	4292	152.4	3	2321	513	22.1	3
