# Supplementary material for: The discriminatory power of the T cell receptor
Source: eLife. 2021 May 25;10:e67092. doi: 10.7554/eLife.67092 (PMC8219380; doi:10.7554/eLife.67092)
Supplement: Figure 3—source data 1. — Each row is associated with an experimental ID that is linked to detailed information on how the data was extracted (see Methods & Appendix text) and to potency plots (Figure 3–figure supplement 1–3). [file elife-67092-fig3-data1.csv]

ID	Receptor and Ligand					Potency Assay			References		Fitting Result
	TCR clone	Peptide	MHC	Type	Species	Assay	Coreceptor	Output	Ref SPR measurement	Ref Potency measurement	Power	Std Error	R squared	P-value	signf	n
1	OT1	OVA (257-264)	H2Kb	CD8	Mouse	Cellular	Yes	Lysis	Alam 1996	Hogquist 1995	12.3800	Perfect line	1.0000		ns	2
2	OT1	OVA (257-264)	H2Kb	CD8	Mouse	Cellular	Yes	Lysis	Alam 1999 (25 degrees)	Hogquist 1995	10.4800	2.3580	0.9518	0.1409	ns	3
3	OT1	OVA (257-264)	H2Kb	CD8	Mouse	Plate	Yes	CD69	Rosette 2001	Rosette 2001 CD69	18.1300	Perfect line	1.0000		ns	2
4	OT1	OVA (257-264)		CD9	Mouse	Cellular	Yes	pERK	Alam 1999	Altan 2005	> 5.127	1.9180	0.8772	0.2279	ns	1(3)
5	OT1	OVA (257-264)	H2Kb	CD8	Mouse	Cellular	Yes	CD69	Stepanek 2014	Daniels 2006	2.0510	0.3304	0.9277	0.0084	sig	5
6	OT1	OVA (257-264)	H2Kb	CD8	Mouse	Cellular	Yes	IFN gamma	Stepanek 2014	Zehn 2009	2.0210	Perfect line	1.0000		ns	2
7	OT1	OVA (257-264)	H2Kb	CD8	Mouse	Cellular	Yes	CD69	Stepanek 2014	Lo 2019	1.1050	0.2702	0.8933	0.0549	ns	4
8	OT1	OVA (257-264)	H2Kb	CD8	Mouse	Cellular	No	CD69	Stepanek 2014	Lo 2019	0.3735	0.1156	0.8392	0.0839	ns	4
9	OT1	OVA (257-264)	H2Kb	CD8	Mouse	Cellular	Yes	CD69	Stepanek 2014	Lo 2019 (G131D)	1.1270	0.1159	0.9793	0.0104	sig	4
10	OT1	OVA (257-264)	H2Kb	CD8	Mouse	Cellular	No	CD69	Stepanek 2014	Lo 2019 (G131D)	1.3560	0.1920	0.9615	0.0195	sig	4
11	3.L2	Hb (64-76)	I-Ek	CD4	Mouse	Cellular	Yes	Lysis	Kersh 1998 (koff)	Kersh 1996	6.7840	0.6087	0.9842	0.0080	sig	4
12	3.L2	Hb (64-76)	I-Ek	CD4	Mouse	Cellular	Yes	Lysis	Persaud 2010	Persaud 2010	0.3703	0.3731	0.2472	0.3941	ns	5
13	3.L2	Hb (64-76)	I-Ek	CD4	Mouse	Cellular	Yes	Lysis	Hong 2015	Kersh 1996	3.1740	0.3659	0.9741	0.0130	sig	4
14	2B4	MCC (88-103)	I-Ek	CD4	Mouse	Cellular	Yes	IL-2	Lyons 1996	Lyons 1996	6.7130	Perfect line	1.0000		ns	2
15	2B4	MCC (88-103)	I-Ek	CD4	Mouse	Cellular	Yes	IL-2	Krogsgaard 2003	Lyons 1996	2.1900	Perfect line	1.0000		ns	2
16	2B4	MCC (88-103)	I-Ek	CD4	Mouse	Plate	Yes	IL-2	Krogsgaard 2003	Krogsgaard 2003	1.2460	0.4127	0.6456	0.0295	sig	7
17	2B4	MCC (88-103)	I-Ek	CD4	Mouse	Cellular	Yes	IL-2	Wu 2002	Lyons 1996	2.8180	Perfect line	1.0000		ns
18	2B4	MCC (88-103)	I-Ek	CD4	Mouse	Cellular	Yes	IL-2	Newell 2011	Newell 2011	2.3100	0.3006	0.9672	0.0165	sig	4
19	2B4	MCC (88-103)	I-Ek	CD4	Mouse	Cellular	Yes	IL-2	Birnbaum 2014	Birnbaum 2014	0.9506	0.2393	0.8403	0.0285	sig	5
20	5cc7	MCC (88-103)	I-Ek	CD4	Mouse	Cellular	Yes	IL-2	Birnbaum 2014	Birnbaum 2014	0.7432	0.9909	0.1581	0.5074	ns	5
21	P14	gp33 (33–41)	H-2Db	CD8	Mouse	Plate	Yes	IFN gamma	Tian 2007	Tian 2007	1.3130	0.2900	0.6722	0.0011	sig	12
22	P14	gp33 (33–41)	H-2Db	CD8	Mouse	Cellular	Yes	Lysis	Tian 2007	Tian 2007	2.0680	0.8658	0.4875	0.0541	ns	12
23	B3K506	3K	IAb	CD4	Mouse	Cellular	Yes	Proliferation	Govern 2010	Govern 2010	2.9320	0.3236	0.9215	<0.0001	sig	9
24	B3K506	3K	IAb	CD4	Mouse	Cellular	Yes	TNF alpha	Govern 2010	Govern 2010	2.4210	0.2209	0.9524	<0.0001	sig	8
25	B3K508	3K	IAb	CD4	Mouse	Cellular	Yes	Proliferation	Govern 2010	Govern 2010	2.9100	0.1665	0.9967	0.0364	sig	3
26	B3K508	3K	IAb	CD4	Mouse	Cellular	Yes	TNF alpha	Govern 2010	Govern 2010	2.4680	0.1441	0.9966	0.0371	sig	3
27	2C	SIYR	H-2Kb	CD8	Mouse	Plate	No	IL-2	Chervin 2009	Chervin 2009	0.1205	0.1900	0.1676	0.5907	ns	4
28	2C	SIYR	H-2Kb	CD8	Mouse	Cellular	No	IL-2	Chervin 2009	Chervin 2009	Too few points				ns	0
29	2C	SIYR	H-2Kb	CD8	Mouse	Cellular	Yes	IL-2	Chervin 2009	Chervin 2009	0.6596	1.7140	0.0690	0.7374	ns	4
30	2C	QL9	H-2Ld	CD8	Mouse	Cellular	Yes	IL-2	Bowerman 2009	Bowerman 2009	2.7180	1.2660	0.8217	0.2775	ns	2
31	2C	QL9 and SIYR	H-2Ld and Kb	CD8	Mouse	Cellular	Yes	IL-2	Jones 2008	Jones 2008	4.6950	1.3830	0.9202	0.1823	ns	3
32	2C	QL9 and SIYR	H-2Ld and Kb	CD8	Mouse	Cellular	No	IL-2	Jones 2008	Jones 2008	6.5410	Perfect line	1.0000		ns	2
33	42F3	QL9	H-2Ld	CD8	Mouse	Cellular	Yes	IL-2	Adam 2016	Adam 2016	0.1480	0.6491	0.0103	0.8287	ns	8
34	AH1 specific	AH1 (gp70 423–431)	H-2Ld	CD8	Mouse	Cellular	Yes	IFN gamma	McMahan 2006	McMahan 2006	5.1480	1.1750	0.7932	0.0072	sig	7
35	1G4	NY-ESO-1 (157-165)	HLA-A2	CD8	Human	Cellular	Yes	Lysis	Irving 2012	Irving 2012	0.6678	0.0428	0.9918	0.0041	sig	4
36	1G4	NY-ESO-1 (157-165)	HLA-A2	CD8	Human	Cellular	Yes	Lysis	Schmid 2010	Schmid 2010	0.6882	0.1999	0.7476	0.0262	sig	7
37	1G4	NY-ESO-1 (157-165)	HLA-A2	CD8	Human	Plate	Yes	IFN gamma	Aleksic 2010	Aleksic 2010	0.6010	0.1195	0.6278	0.0001	sig	17
38	1G4	NY-ESO-1 (157-165)	HLA-A2	CD8	Human	Cellular	Yes	Lysis	Aleksic 2010	Aleksic 2010	1.5660	0.2096	0.8886	0.0001	sig	9
39	1G4	NY-ESO-1 (157-165)	HLA-A2	CD8	Human	Plate	Yes	IFN gamma	Dushek 2011	Dushek 2011	0.5481	0.1713	0.6306	0.0186	sig	8
40	G10	gag p17	HLA-A2	CD8	Human	Plate	Yes	IFN gamma	Dushek 2011	Dushek 2011	0.9500	0.1647	0.7872	0.0003	sig	9
41	1E6	INS	HLA-A2	CD8	Human	Cellular	Yes	Lysis	Cole 2016 (25 degree)	Cole 2016	1.1370	0.8485	0.6157	0.0367	sig	7
42	1E6	INS	HLA-A2	CD8	Human	Cellular	Yes	Lysis	Cole 2016 (37 degree)	Cole 2016	1.1950	0.2916	0.8485	0.0263	sig	5
43	A6	Tax (11-19)	HLA-A2	CD8	Human	Cellular	Yes	CD107	Thomas S. 2011	Thomas S. 2011	1.9980	0.3783	0.9654	0.1191	ns	3
44	A6	Tax (11-19)	HLA-A2	CD8	Human	Cellular	Yes	IFN gamma	Thomas S. 2011	Thomas S. 2011	2.2200	0.4203	0.9654	0.1191	ns	2
45	gp100-specific TCR (gp209)	gp100 (209–217)	HLA-A2	CD8	Human	Cellular	Yes	IFN gamma	Zhong 2013	Zhong 2013	1.2960	0.5391	0.7430	0.1380	ns	6
46	gp100-specific TCR (gp 209)	gp100 (209–217)	HLA-A2	CD8	Human	Cellular	Yes	ppERK	Zhong 2013	Zhong 2013	1.2020	0.8411	0.4051	0.2483	ns	6
47	gp100 TCR	gp100 (280–288)	HLA-A2	CD8	Human	Cellular	Yes	Lysis	Bianchi 2016	Bianchi 2016	2.2780	0.7349	0.7061	0.0362	sig	6
48	gp100 TCR	gp100 (280–288)	HLA-A2	CD8	Human	Cellular	Yes	MIP-1 beta	Bianchi 2016	Bianchi 2016	3.6030	0.5381	0.9181	0.0026	sig	6
49	14.3.d	SEC3	none	CD4	Human	Plate	No	NFAT	Andersen, Geisler 2001	Andersen, Geisler 2001	0.8052	0.2193	0.9309	0.1693	ns	3
50	14.3.d	F23.1	none	CD4	Human	Plate	No	NFAT	Andersen, Menne 2001	Andersen, Geisler 2001	0.6558	0.8289	0.2384	0.5118	ns	4
51	TCR55	HIV Pol(448-456)	HLA-B35	CD4	Human	Cellular	Yes	CD69	Sibener 2018	Sibener 2018	0.1914	0.2168	0.1001	0.4067	ns	9
52	ILA1	ILA	HLA-A2	CD8	Human	Cellular	Yes	Degranulation	Laugel 2007	Laugel 2007	1.0120	0.3805	0.7024	0.0763	ns	4
53	ILA1	ILA	HLA-A2	CD8	Human	Cellular	No	Degranulation	Laugel 2007	Laugel 2007	0.1893	1.1790	0.0251	0.8986	ns	4
54	ILA1	ILA	HLA-A2	CD8	Human	Cellular	Yes	CD107a	Laugel 2007	Laugel 2007	2.1940	0.2973	0.9646	0.0179	sig	4
55	ILA1	ILA	HLA-A2	CD8	Human	Cellular	No	CD107a	Laugel 2007	Laugel 2007	3.5660	0.2662	0.9890	0.0055	sig	4
56	ILA1	ILA	HLA-A2	CD8	Human	Cellular	Yes	IFN gamma	Laugel 2007	Laugel 2007	2.1860	0.3877	0.9408	0.0300	sig	4
57	ILA1	ILA	HLA-A2	CD8	Human	Cellular	No	IFN gamma	Laugel 2007	Laugel 2007	3.2410	0.4060	0.9696	0.0153	sig	4
58	ILA1	ILA	HLA-A2	CD8	Human	Cellular	Yes	MIP-1 beta	Tan 2015	Tan 2015	1.3650	0.5412	0.7609	0.1277	ns	5
59	ILA1	ILA	HLA-A2	CD8	Human	Cellular	Yes	IFN gamma	Tan 2015	Tan 2015	0.7694	0.0570	0.9892	0.0054	sig	5
60	ILA1	ILA	HLA-A2	CD8	Human	Cellular	Yes	TNF alpha	Tan 2015	Tan 2015	0.9746	0.2368	0.8944	0.0543	ns	5
61	ILA1	ILA	HLA-A2	CD8	Human	Cellular	Yes	IL-2	Tan 2015	Tan 2015	1.0970	0.0839	0.9884	0.0058	sig	5
62	KFJ	NY-ESO-1 (60-72)	HLA-B*07:02	CD8	Human	Cellular	Yes	TNF alpha	Chan 2018	Chan 2018	-0.5888	0.9871	0.1510	0.6114	ns	4
63	Gliadin specific TCR	Gliadin	HLA-DQ8	CD4	Human	Cellular	Yes	Proliferation	Broughton 2012	Broughton 2012	0.8251	0.0267	0.9990	0.0206	sig	4
64	LC13	FLR	HLA-B*0801	CD8	Human	Cellular	Yes	CD69	Burrows 2010	Burrows 2010	1.8570	0.1618	0.9850	0.0075	sig	5
65	LC13	FLR	HLA-B*0801	CD8	Human	Cellular	No	CD69	Burrows 2010	Burrows 2010	7.7500	0.0403	1.0000	0.0033	sig	3
66	LC13	FLR	HLA-B*0801	CD8	Human	Cellular	Yes	Lysis	Burrows 2010	Burrows 2010	4.0790	2.0560	0.7975	0.2972	ns	3
67	SB27	LPEP	HLA-B*3508	CD8	Human	Cellular	Yes	Lysis	Burrows 2010	Burrows 2010	0.1087	0.1857	0.1025	0.5994	ns	5
68	gag-specific TCR	Gag293 (HIV)	HLA-DRB1	CD4	Human	Cellular	Yes	CD69	Benati 2016	Benati 2016	1.0480	0.2913	0.7212	0.0156	sig	7
69	MEL5	MART-1 (27-35)	HLA-A2	CD8	Human	Cellular	Yes	MIP-1 beta	Ekeruche-Makinde 2012	Ekeruche-Makinde 2012	2.2720	0.4209	0.8063	0.0010	sig	6
70	MEL5	MART-1 (27-35)	HLA-A2	CD8	Human	Cellular	Yes	MIP-1 beta	Madura 2019	Madura 2019	4.4690	2.5500	0.5060	0.1779	ns	6
