# Supplementary figures and images for: The discriminatory power of the T cell receptor
Source: eLife journal article supplement (doi:10.7554/elife.67092), 2021-05-24

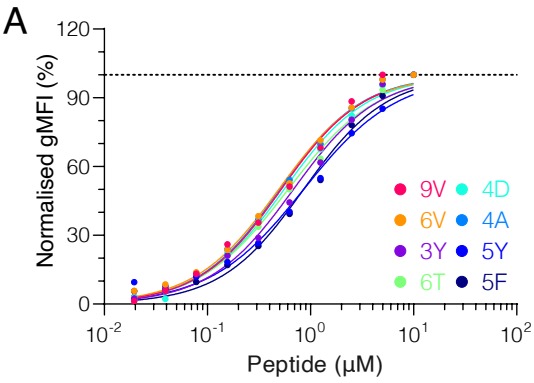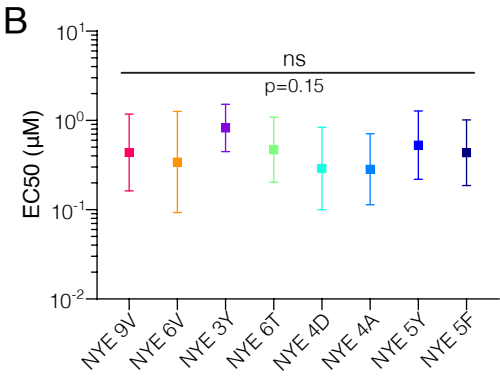

Supplement: supp [file elife-67092-supp-v1.zip]

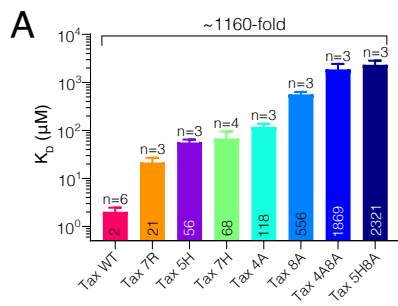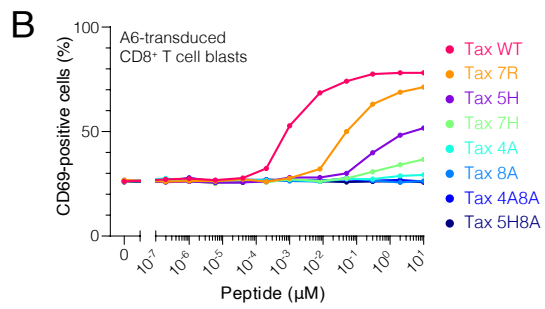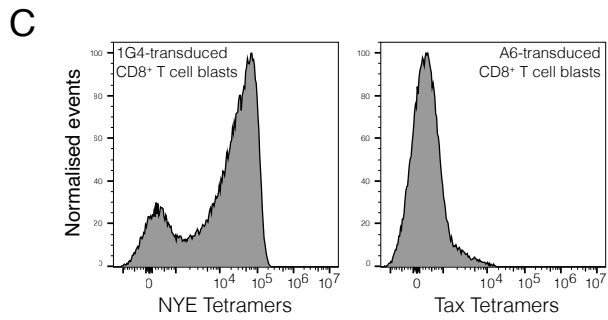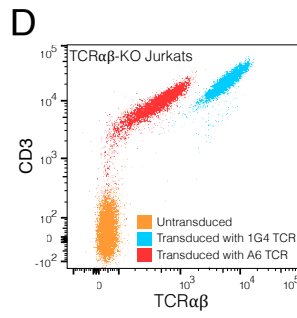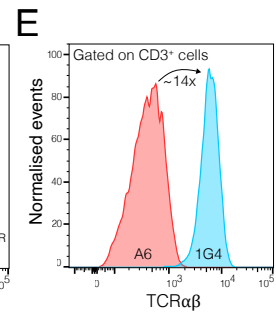

Supplement: supp [file elife-67092-supp-v1.zip]

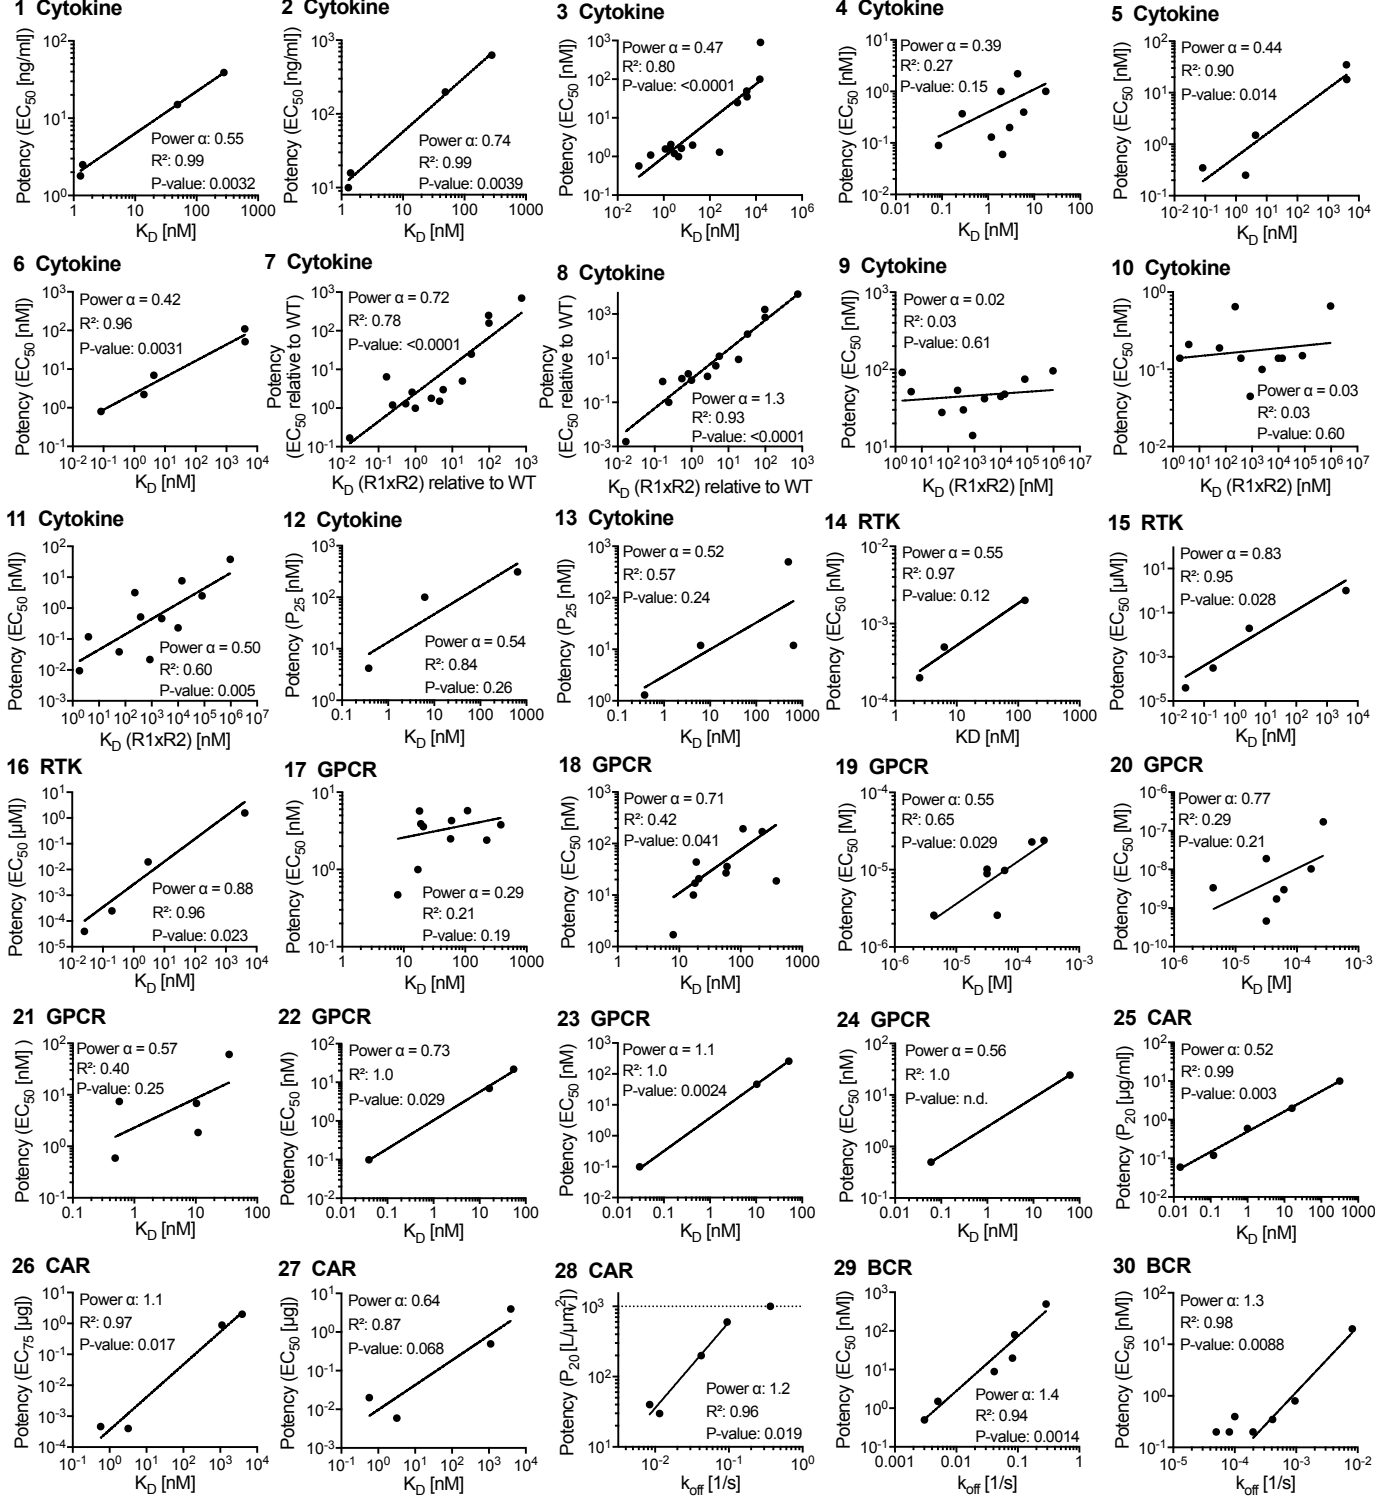

Supplement: supp [file elife-67092-supp-v1.zip]

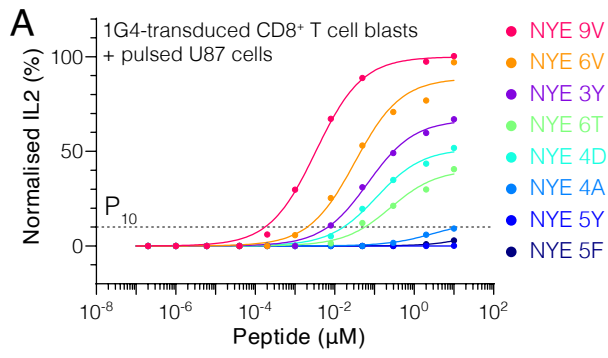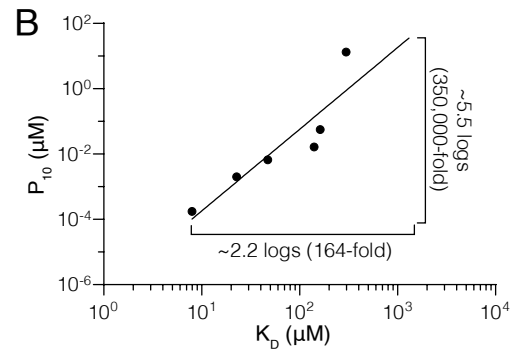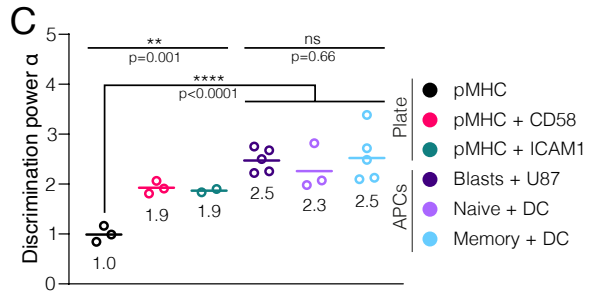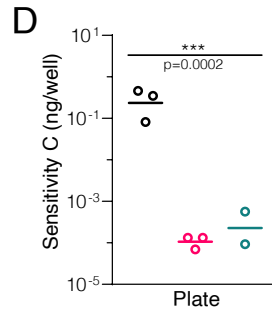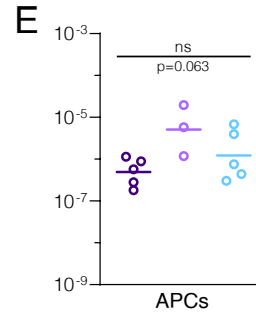

Supplement: supp [file elife-67092-supp-v1.zip]

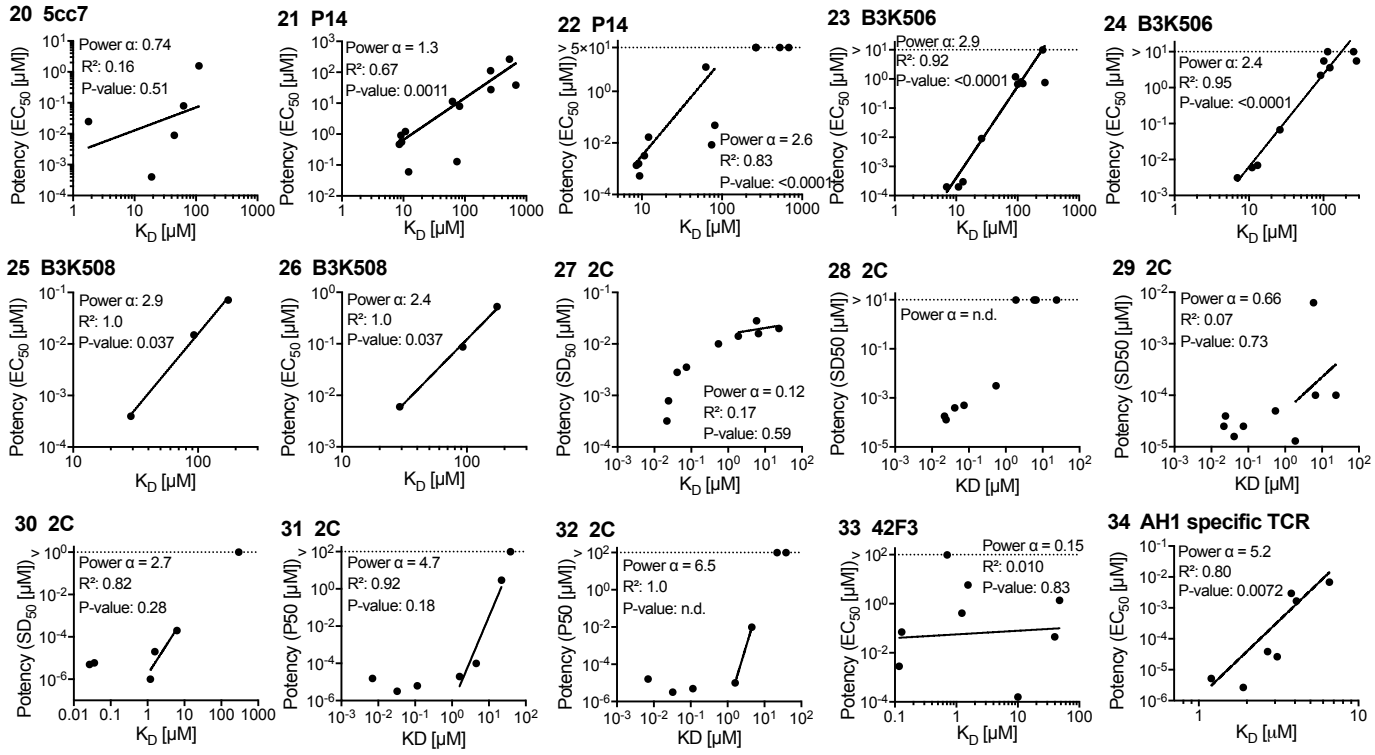

Supplement: supp [file elife-67092-supp-v1.zip]

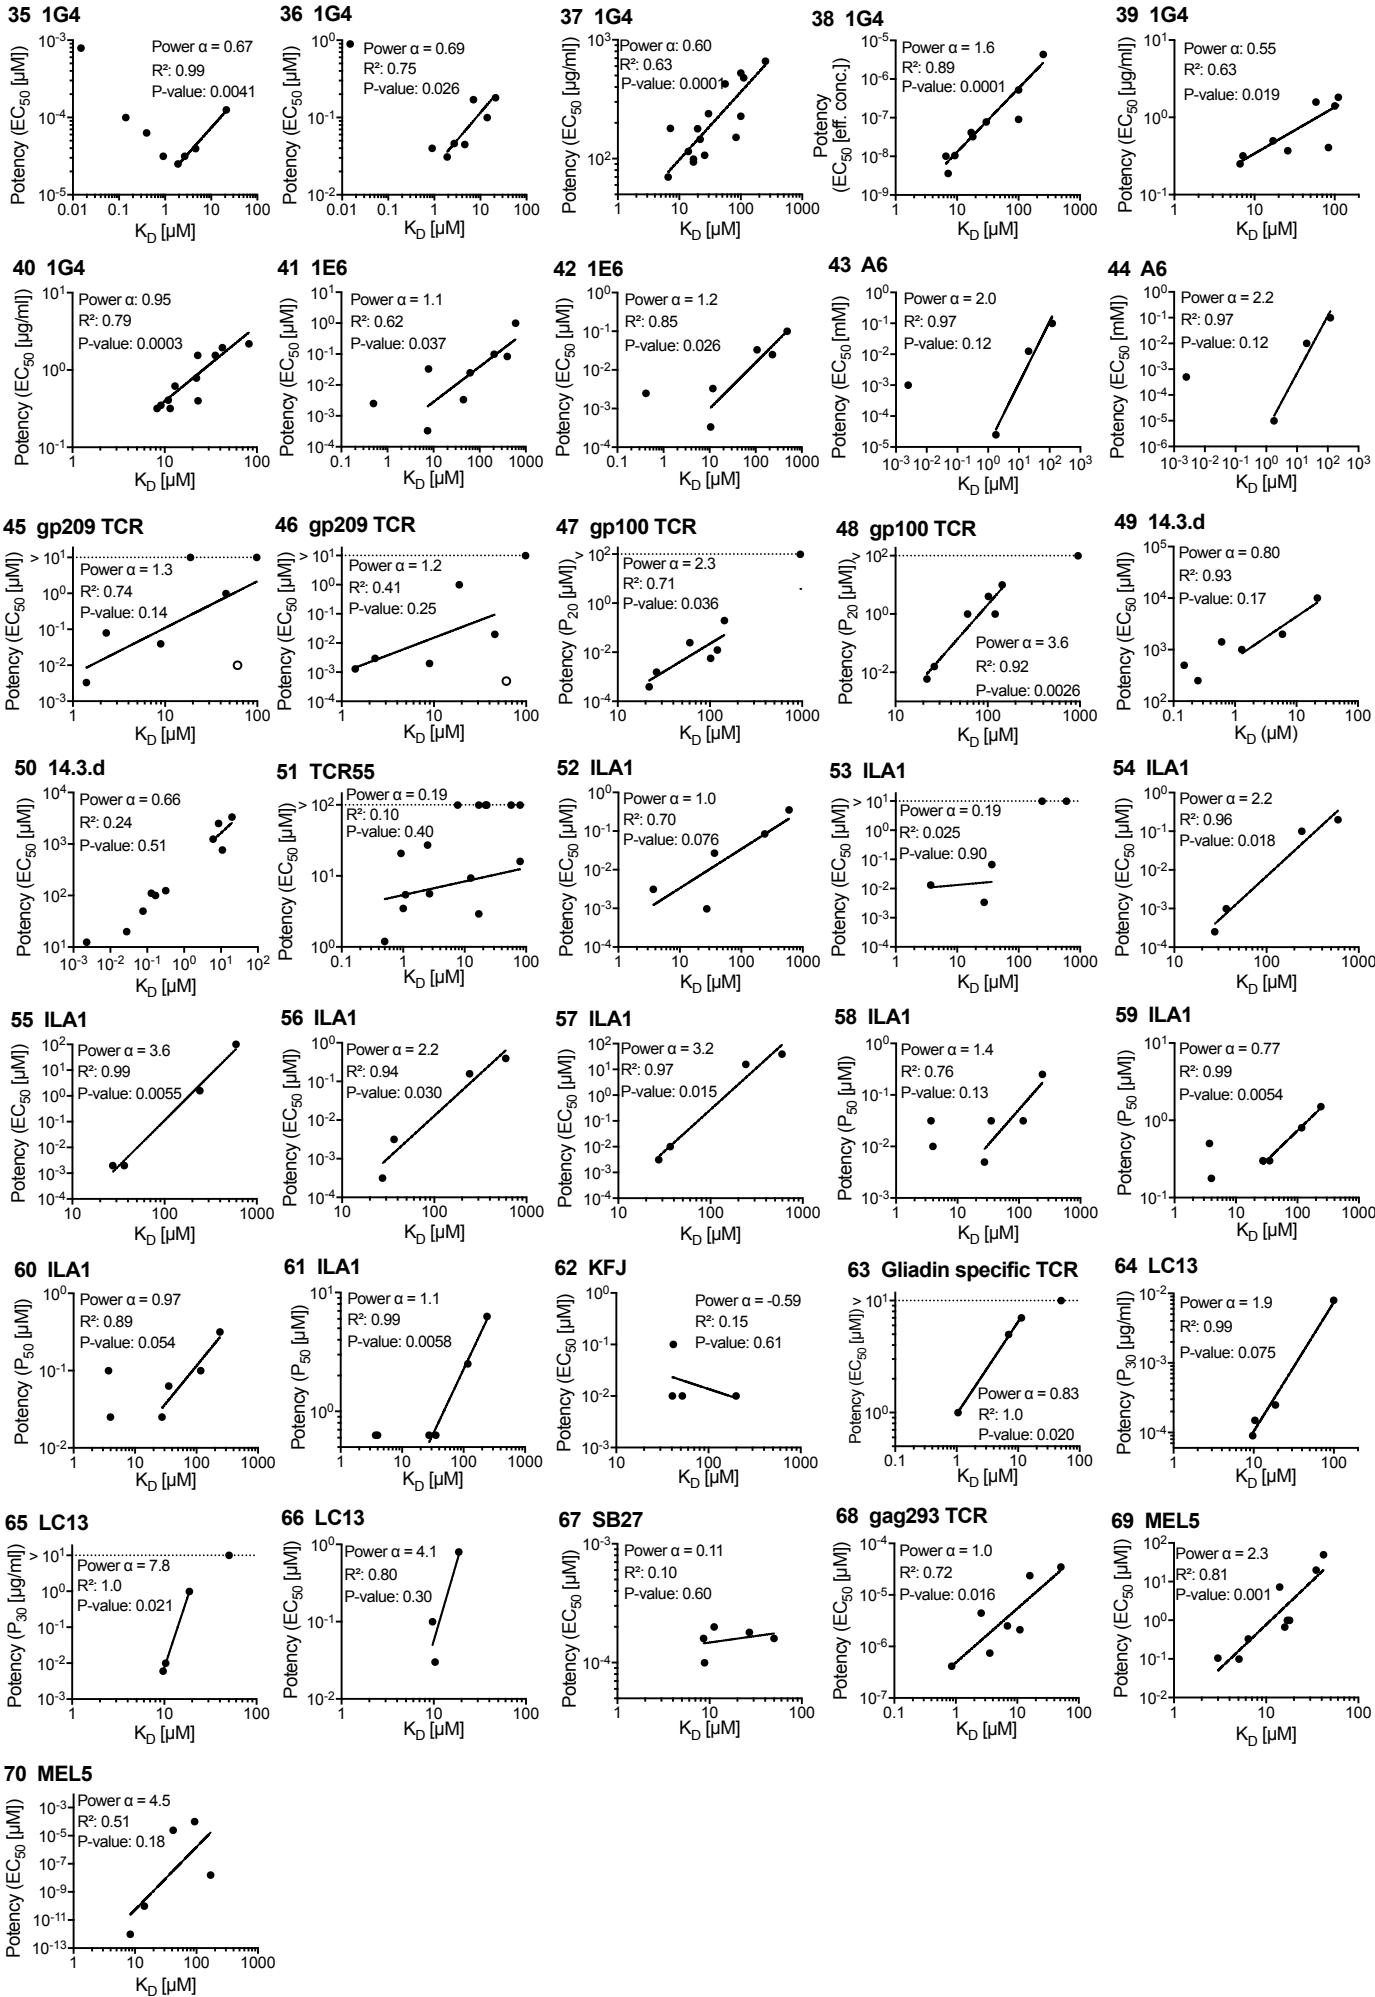

Supplement: supp [file elife-67092-supp-v1.zip]

**A**

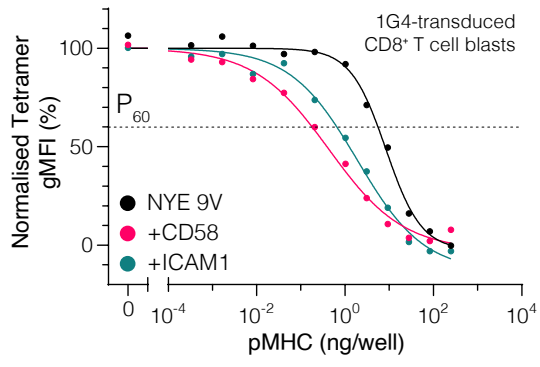

**B**

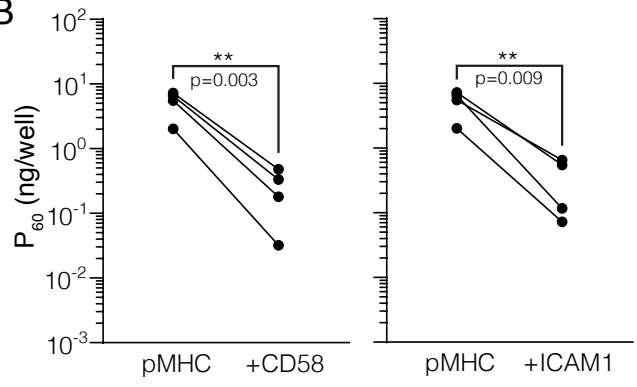

Supplement: supp [file elife-67092-supp-v1.zip]

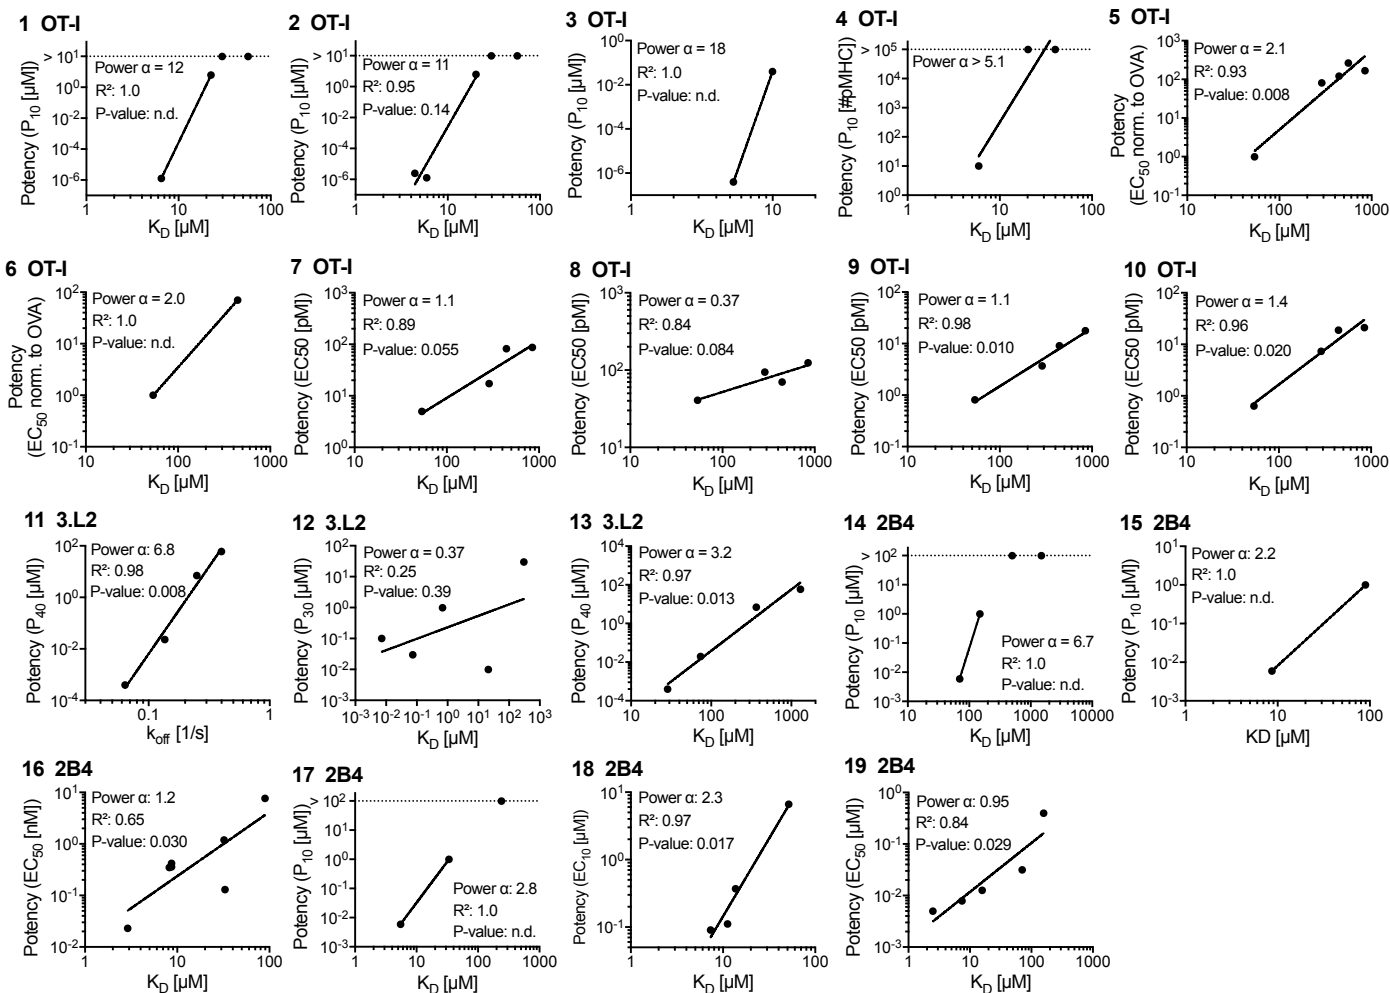

Supplement: supp [file elife-67092-supp-v1.zip]
